# Supplementary material for: Multi-Walled Carbon Nanotube-Induced Gene Expression Biomarkers for Medical and Occupational Surveillance
Source: Int J Mol Sci. 2019 May 29;20(11):2635. doi: 10.3390/ijms20112635 (PMC6600433; doi:10.3390/ijms20112635)
Supplement: Supplementary file 1 [file ijms-20-02635-s001.xlsx]

## Sheet: Concordant mRNAs tissue_SAEC
mRNA	Tissue Fold Change	Cell Fold Change	Disease Implications
1 month animal exposure
CAND1	-1.6	-4.7	Peripheral artery disease, preeclampsia
CYCS	-1.6	-2.9	Thrombocytopenia, Huntington disease, autosomal dominant thrombocytopenia type 4, growth failure, psoriasis, Duchenne muscular dystrophy, epithelial cancer, liver cancer, hepatocellular carcinoma, fulminant hepatitis, chronic autoimmune hepatitis, alcoholic liver disease, primary sclerosing cholangitis, primary biliary cirrhosis, cholestasis, hepatitis C, hepatitis B, viral hepatitis, organismal …
DENND5B	-1.5	-3.3	None known
HS3ST3B1	-1.8	-3.2	None known
MAML1	-1.8	-3.8	Growth failure, dystrophy, tumorigenesis, hyperplasia, chronic myelomonocytic leukemia, transitional cell bladder cancer, urothelial bladder carcinoma, experimental autoimmune encephalomyelitis, actinic keratosis, muscular dystrophy
MAN2B2	-1.8	-3.3	Breast cancer
METTL21	-1.6	-3.2	None known
PIGS	-1.6	-3	None known
PPP1C	-1.9	-3	Systemic lupus erythematosus, dilated cardiomyopathy, persistent atrial fibrillation, cardiomyopathy
S100A5	1.6	3.3	Liver cancer, hepatocellular carcinoma, epithelial cancer
SEL1L	-1.7	3.2	Hyperinsulinemic hypoglycemia, experimental colitis, impaired glucose tolerance, hyperglycemia, prostate cancer, rheumatoid arthritis
SH3BP2	-2	-3	Cherubism
SLC7A1	-1.5	-5.4	Anisopoikilocytosis, anemia, hypertension, prostate cancer, leiomyomatosis, uterine leiomyoma, rheumatoid arthritis
TGM2	-1.6	-3.1	Huntington disease, early onset type 2 diabetes, weight gain, ventricular fibrillation, endotoxin shock response, hyperglycemia, adenoma formation, progressive supranuclear palsy, weight loss, neoplasia, hypoglycemia, renal oncocytoma, papillary renal cell carcinoma, renal neoplasia, papillary renal cell neoplasia, renal cell cancer, systemic lupus erythematosus, renal clear cell cancer, renal cl…
XRN2	-1.6	-3.5	None known
6 months animal exposure
KIF14	-1.6	-4.9	Mental retardation with microcephaly, autosomal recessive primary microcephaly, congenital anomalies of kidney and urinary tract, Meckel syndrome type 12, demyelination, hypoplasia, gait disturbance, ataxia, invasive breast cancer, breast carcinoma, invasive breast carcinoma, endometrial adenocarcinoma formation, endometrial adenocarcinoma, rectum cancer, colorectal carcinomagenesis, rectal adeno…
MYBPC2	1.6	11	Polyarticular juvenile rheumatoid arthritis, actinic keratosis, squamous cell cancer, squamous-cell carcinoma, osteolysis, T-cell large granular lymphocytic leukemia, chronic lymphocytic leukemia, inflammatory bowel disease, non-insulin-dependent diabetes mellitus, polycystic ovary syndrome, papillary thyroid cancer, papillary thyroid carcinoma, primary cardiomyopathy, renal clear cell cancer, re…
PSD4	1.9	3.5	None known
TTLL7	-1.5	-3.2	Peripheral artery disease
12 months animal exposure
ADH5	-1.9	-3.1	Infection by bacteria, digestive system cancer, liver neoplasia, liver cancer, epithelial neoplasia, abdominal cancer, epithelial cancer, cancer, asthma, neoplasia
ANLN	-1.5	-7.7	Focal segmental glomerulosclerosis type 8, focal segmental glomerulosclerosis, epithelial cancer, liver cancer, hepatocellular carcinoma
ARF1	-1.7	-3	Infection by lymphocytic choriomeningitis virus, infection by vesicular stomatitis virus, epithelial cancer, hepatocellular carcinoma, infection by HIV-1, endometriosis, rheumatoid arthritis, liver cancer
CCDC115	-1.7	-3	Disorder of golgi homeostasis, congenital disorder of glycosylation type 2o, congenital disorder of glycosylation type 2
CYCS	-2.4	-2.9	Thrombocytopenia, Huntington disease, autosomal dominant thrombocytopenia type 4, growth failure, psoriasis, Duchenne muscular dystrophy, epithelial cancer, liver cancer, hepatocellular carcinoma, fulminant hepatitis, chronic autoimmune hepatitis, alcoholic liver disease, primary sclerosing cholangitis, primary biliary cirrhosis, cholestasis, hepatitis C, hepatitis B, viral hepatitis, organismal …
DDX24	-1.6	-2.8	Pervasive developmental disorder, leiomyomatosis, uterine leiomyoma
FAM188A	-1.6	-4.9	Neoplasia, non-small cell lung cancer
IKZF2	-1.6	-2.8	Adult T cell leukemia, hypergammaglobulinemia, T acute lymphoblastic leukemia, precursor B-cell acute lymphoblastic leukemia, tropical spastic paraparesis, neoplasia, lymphatic neoplasia, hematological neoplasia, lymphoid cancer, hematologic cancer, cancer, lymphomagenesis
IL1R1	-1.5	-5.3	Rheumatoid arthritis, arthritis, infection by bacteria, insulin-dependent diabetes mellitus, experimental autoimmune encephalomyelitis, weight gain, weight loss, sepsis, endometriosis, metabolic syndrome X, adult onset Still disease, ST-elevation myocardial infarction, acute alcoholic hepatitis, familial Mediterranean fever, acute myocarditis, susceptibility to ovarian cancer, heart failure, chro…
INTS4	-1.7	-3.1	None known
MAD2L1	-1.7	-3.2	Lung cancer, chromosomal instability, thoracic cancer, lung carcinoma process, non-small cell lung cancer, non-squamous non-small cell lung cancer, lung adenocarcinoma formation, cancer, epithelial cancer, epithelial neoplasia, neoplasia, brain cancer, alopecia, psoriasis, colon cancer
PIGU	-1.5	-3.6	None known
PIKFYVE	-1.9	-3.3	Fleck corneal dystrophy
PNRC2	-1.5	-2.9	Obesity, weight loss
PRKRIR	-1.6	-3.9	Leiomyomatosis, uterine leiomyoma
PRIM2	-1.7	-3.1	Follicular lymphoma, chronic lymphocytic leukemia, Waldenström macroglobulinemia, diffuse large B-cell lymphoma, acute myeloid leukemia, relapsed acute myeloid leukemia, myelodysplastic syndrome, lymphocytic leukemia, mantle cell lymphoma, transformed follicular B-cell lymphoma, double hit type high grade B-cell lymphoma, FANCC IVS-4 mutation positive Fanconi anemia, Fanconi anemia, natural kille…
RNF19A	-2	-3	None known
SDHD	-1.6	-3.6	Paraganglioma formation, hereditary paraganglioma-pheochromocytoma syndrome, pheochromocytoma formation, abdominal paraganglioma formation, Carney-Stratakis syndrome, succinate-coenzyme q reductase deficiency, paraganglioma, pheochromocytoma, cancer, breast carcinoma, extra-adrenal paraganglioma formation, urological cancer, urogenital cancer, urinary tract cancer, renal neoplasia, renal cancer, …
SGOL2	-1.5	-3.2	Premature ovarian failure, gonadal dysgenesis with auditory dysfunction, autosomal recessive inheritance, fragile X-associated primary ovarian insufficiency
SLC30A7	-1.5	-4.1	Weight gain, Joubert syndrome type 1, hyperglycemia, zinc deficiency, insulin resistance
TMPO	-1.5	-6.1	Hutchinson-Gilford progeria syndrome, gastric cancer
TMPRSS6	1.5	3.1	Iron deficiency anemia, alopecia, anemia, microcytic anemia, decreased hepcidin levels, nonalcoholic fatty liver disease, hemochromatosis, microcytosis, growth failure, anisopoikilocytosis, iron deficiency, hematological disorder, iron overload, splenomegaly, iron-refractory iron deficiency anemia
UBE2E1	-1.7	-6.3	Non-insulin-dependent diabetes mellitus, autosomal dominant polycystic kidney disease, productive infection by HIV-1
VAC14	-1.9	-3.2	Yunis-Varon Syndrome, autosomal recessive Parkinson disease, pediatric-onset neurological disease, childhood-onset striatonigral degeneration, osmotic shock response, neurodegeneration
WDR74	-1.9	-2.9	Liver cancer, melanoma, ovarian cancer, head and neck cancer, colon cancer, breast cancer, bladder cancer, squamous cell lung cancer, chronic lymphocytic leukemia, melanoma cancer, lung adenocarcinoma formation, lung adenocarcinoma

## Sheet: Concordant mRNAs tissue_HMVEC
mRNA	Tissue Fold Change	Cell Fold Change	Disease Implications
1 month animal exposure
CAND1	-1.6	-3.9	Peripheral artery disease, preeclampsia
HIST1H3F	1.7	14.8	None known
PPP1CC	-1.9	-3.5	Systemic lupus erythematosus, dilated cardiomyopathy, persistent atrial fibrillation, cardiomyopathy
SH2D1A	-1.6	-3.5	X-linked lymphoproliferative syndrome, X-linked lymphoproliferative syndrome type 1, hemophagocytic lymphohistiocytosis, infection by parasite, common variable immunodeficiency, infection by virus, mature B-cell neoplasia, non-Hodgkin disease, B-cell non-Hodgkin disease, lymphatic neoplasia, hematological neoplasia, lymphoid cancer, hematologic cancer, B-cell neoplasia, B cell cancer, lymphomagen…
SH3BP2	-2	-3.7	Cherubism
SLC22A5	-1.8	-3.1	Glucose transporter type 1 deficiency syndrome, stomatin-deficient cryohydrocytosis, idiopathic generalized epilepsy, early-onset absence epilepsy, episodic choreoathetosis/spasticity, paroxysmal exertion-induced dyskinesia, non-syndromic mental retardation, paroxysmal dyskinesia, paroxysmal kinesigenic choreoathetosis, epileptic encephalopathy, infantile spasms with intellectual disability, ment…
TGM2	-1.6	-2.8	Huntington disease, early onset type 2 diabetes, weight gain, ventricular fibrillation, endotoxin shock response, hyperglycemia, adenoma formation, progressive supranuclear palsy, weight loss, neoplasia, hypoglycemia, renal oncocytoma, papillary renal cell carcinoma, renal neoplasia, papillary renal cell neoplasia, renal cell cancer, systemic lupus erythematosus, renal clear cell cancer, renal cl…
6 months animal exposure
HIST1H2AL	2.1	12.9	None known
TFEC	-1.8	-3.6	None known
12 months animal exposure
ABCE1	-1.6	-3	None known
EIF4B	-1.7	-3.1	Breast cancer, neoplasia, breast carcinoma
IKZF2	-1.6	-3.9	Adult T cell leukemia, hypergammaglobulinemia, T acute lymphoblastic leukemia, precursor B-cell acute lymphoblastic leukemia, tropical spastic paraparesis, neoplasia, lymphatic neoplasia, hematological neoplasia, lymphoid cancer, hematologic cancer, cancer, lymphomagenesis
IL1R1	-1.5	-3.3	Rheumatoid arthritis, arthritis, infection by bacteria, insulin-dependent diabetes mellitus, experimental autoimmune encephalomyelitis, weight gain, weight loss, sepsis, endometriosis, metabolic syndrome X, adult onset Still disease, ST-elevation myocardial infarction, acute alcoholic hepatitis, familial Mediterranean fever, acute myocarditis, susceptibility to ovarian cancer, heart failure, chro…
LXN	-1.7	-5.1	None known
MID1	2.4	3.9	Opitz G/BBB syndrome, hyperactive behavior, hypospadia, X-linked Opitz GBBB syndrome
NPM1	-1.5	-3.4	Acute myeloid leukemia, myelodysplastic syndrome, Huntington disease, neoplasia, hematologic cancer, lymphomagenesis, hepatitis C virus-related hepatocellular carcinoma, liver cancer, hepatitis B virus-related hepatocellular carcinoma, malignant hematopoietic neoplasm, chronic myelomonocytic leukemia, acute myeloid leukemia associated with myelodysplastic syndrome, endometrioid endometrial cancer…
NUDT8	1.6	2.9	None known
PIKFYVE	-1.9	-3.4	Fleck corneal dystrophy
PPP1CC	-1.7	-3.5	Systemic lupus erythematosus, dilated cardiomyopathy, persistent atrial fibrillation, cardiomyopathy
SDHD	-1.6	-3.6	Paraganglioma formation, hereditary paraganglioma-pheochromocytoma syndrome, pheochromocytoma formation, abdominal paraganglioma formation, Carney-Stratakis syndrome, succinate-coenzyme q reductase deficiency, paraganglioma, pheochromocytoma, cancer, breast carcinoma, extra-adrenal paraganglioma formation, urological cancer, urogenital cancer, urinary tract cancer, renal neoplasia, renal cancer, …
SLC30A7	-1.5	-3.4	Weight gain, Joubert syndrome type 1, hyperglycemia, zinc deficiency, insulin resistance
SMARCAD1	-1.5	-4	Adermatoglyphia, Basan syndrome
UBE2E1	-1.7	-4.5	Non-insulin-dependent diabetes mellitus, autosomal dominant polycystic kidney disease, productive infection by HIV-1
ZC3H13	-1.6	-3.4	None known

## Sheet: Concordant mRNAs blood_SAEC
mRNA	Tissue Fold Change	Cell Fold Change	Disease Implications
1 month animal exposure
CFTR	-1.5	-3.9	Cystic fibrosis, congenital absence of vas deferens, pancreatitis, chronic pancreatitis, pulmonary disease, bronchiectasis, growth failure, infection, obstructive azoospermia, azoospermia, diarrhea, meconium ileus, chronic bronchitis, CFTR-related disorder, head and neck neoplasia, asthma, disseminated bronchiectasis, congenital bilateral aplasia of vas deferens, low sweat chloride hypertrypsinem…
HSD17B2	1.6	3.6	Endometriosis, exencephaly, macrocephaly, growth failure, hydrocephalus, colorectal neoplasia, colon neoplasm, bipolar disorder, colon cancer
PER1	-1.5	-3.4	Hospital-acquired pneumonia, ventilator-associated pneumonia, complicated intra-abdominal infection, complicated urinary tract infection, pyelonephritis, bacterial disease, cystic fibrosis, hyperactive behavior, epithelial cancer, prostate cancer, prostatic carcinoma, mature T-cell neoplasia, T-cell non-Hodgkin disease, peripheral T-cell lymphoma, atopic dermatitis, systemic sclerosis
RIMKLB	-1.5	-3	None known
SH3RF3	-1.5	-4.7	None known
SLC7A1	-1.5	-5.4	Anisopoikilocytosis, anemia, hypertension, prostate cancer, leiomyomatosis, uterine leiomyoma, rheumatoid arthritis
6 months animal exposure
HMGB2	-1.6	-3.6	Head and neck neuroendocrine neoplasia, adenoma formation, pituitary gland adenoma, Huntington disease, colon cancer, metastatic colorectal cancer
12 months animal exposure
SYTL3	-1.5	-4.3	None known

## Sheet: Concordant mRNAs blood_HMVEC
mRNA	Tissue Fold Change	Cell Fold Change	Disease Implications
1 month animal exposure
PER1	-1.5	-5.2	Hospital-acquired pneumonia, ventilator-associated pneumonia, complicated intra-abdominal infection, complicated urinary tract infection, pyelonephritis, bacterial disease, cystic fibrosis, hyperactive behavior, epithelial cancer, prostate cancer, prostatic carcinoma, mature T-cell neoplasia, T-cell non-Hodgkin disease, peripheral T-cell lymphoma, atopic dermatitis, systemic sclerosis
SLC22A5	-1.5	-3.1	Glucose transporter type 1 deficiency syndrome, stomatin-deficient cryohydrocytosis, idiopathic generalized epilepsy, early-onset absence epilepsy, episodic choreoathetosis/spasticity, paroxysmal exertion-induced dyskinesia, non-syndromic mental retardation, paroxysmal dyskinesia, paroxysmal kinesigenic choreoathetosis, epileptic encephalopathy, infantile spasms with intellectual disability, ment…
TUBA1B	1.5	2.8	Parkinson disease
6 months animal exposure
HIST1H3H	1.6	7.4	None known
KPRP	1.8	5.4	Psoriasis
KRT79	1.6	9.6	Psoriasis
MID1	-1.7	-3.9	Opitz G/BBB syndrome, hyperactive behavior, hypospadia, X-linked Opitz GBBB syndrome
SHCBP1	1.5	8.8	Experimental autoimmune encephalomyelitis, productive infection by HIV-1
